## Judith Eisen joins the *Development* editorial team

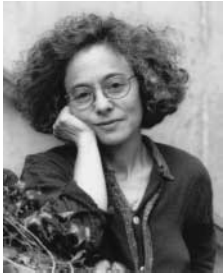

With this issue of the journal, *Development* welcomes a new editor to the team. Judith Eisen works at the University of Oregon Institute of Neuroscience, where she uses zebrafish embryos and a combination of cellular, molecular and genetic approaches to study the way in which neuronal diversity is generated during development. In particular, she is interested in discovering how the correct numbers of cells are specified for specific neuronal fates at

particular times and in particular locations. We are delighted that Judith is joining the team: she is a superb scientist, and she brings additional expertise in neural development to the journal, as well as being our first 'zebrafish' editor.

**Jim Smith**  
Editor in Chief

Development 131, 3237  
Published by The Company of Biologists 2004  
doi:10.1242/dev.01293
